# Supplementary material for: KCNQ2 Selectivity Filter Mutations Cause Kv7.2 M-Current Dysfunction and Configuration Changes Manifesting as Epileptic Encephalopathies and Autistic Spectrum Disorders
Source: MDPI journal article supplement (doi:10.3390/cells11050894), 2022-03-05
Supplement: s1 [file s1]

Supplementary Table S1. Currents and  $V_{1/2}$  in homomeric and heteromeric transfected HEK293 cell in the variants of p.Gly281Glu, p.Thr287Ile, and p.Gly281Glu.

|                                                                           | N  | Currents<br>at -10 mV<br>(pA)<br>(mean±SD)             | Currents<br>at 0 mV<br>(pA)<br>(mean±SD)                | Currents<br>at +10 mV<br>(pA)<br>(mean±SD)              | Currents<br>at +20 mV<br>(pA)<br>(mean±SD)               | Currents<br>at +30 mV<br>(pA)<br>(mean±SD)                | Currents<br>at +40 mV<br>(pA)<br>(mean±SD)                |
|---------------------------------------------------------------------------|----|--------------------------------------------------------|---------------------------------------------------------|---------------------------------------------------------|----------------------------------------------------------|-----------------------------------------------------------|-----------------------------------------------------------|
| <i>KCNQ2</i> WT (2 ug) *                                                  | 22 | 596.5 ± 121.5                                          | 769.3 ± 119.3                                           | 954.1 ± 121.5                                           | 1145.8 ± 117.9                                           | 1333.9 ± 120.8                                            | 1534.5 ± 141.9                                            |
| p.Gly281Glu (2 ug)                                                        | 8  | <b>480.9 ± 101.5</b><br><b>t(30) = 3.51, p = 0.001</b> | <b>600.0 ± 96.6</b><br><b>t(30) = 4.70, p &lt; .001</b> | <b>721.8 ± 89.3</b><br><b>t(30) = 6.07, p &lt; .001</b> | <b>852.8 ± 91.6</b><br><b>t(30) = 7.25, p &lt; .001</b>  | <b>979.6 ± 97.1</b><br><b>t(30) = 8.78, p &lt; .001</b>   | <b>1109.4 ± 112.6</b><br><b>t(30) = 8.76, p &lt; .001</b> |
| p.Thr287Ile (2 ug)                                                        | 10 | <b>505.3 ± 56.25</b><br><b>t(30) = 2.25, p = .032</b>  | <b>649.9±85.7</b><br><b>t(30) = 2.84, p = .008</b>      | <b>789.5±92.9</b><br><b>t(30) = 3.80, p = .001</b>      | <b>937.7 ± 99.1</b><br><b>t(30) = 4.85, p &lt; .001</b>  | <b>1087.0 ± 107.3</b><br><b>t(30) = 5.54, p &lt; .001</b> | <b>1240.1 ± 122.2</b><br><b>t(30) = 5.66, p &lt; .001</b> |
| p.Pro285Thr (2 ug)                                                        | 10 | <b>465.2 ± 64.0</b><br><b>t(30) = 3.20, p = .003</b>   | <b>599.7±76.4</b><br><b>t(30) = 4.11, p &lt; .001</b>   | <b>747.5±93.7</b><br><b>t(30) = 4.76, p &lt; .001</b>   | <b>890.9 ± 110.5</b><br><b>t(30) = 5.78, p &lt; .001</b> | <b>1035 ± 110.6</b><br><b>t(30) = 6.65, p &lt; .001</b>   | <b>1173.3 ± 126.5</b><br><b>t(30) = 6.89, p &lt; .001</b> |
| <i>KCNQ2</i> WT + p.Gly281Glu (1ug:1 ug)                                  | 8  | 534.0 ± 75.3<br>t(30) = 1.43, p = .164                 | <b>679.1±61.0</b><br><b>t(30) = 2.14, p = .041</b>      | <b>843.4±63.6</b><br><b>t(30) = 2.57, p = .015</b>      | <b>987.1 ± 51.0</b><br><b>t(30) = 3.86, p &lt; .001</b>  | <b>1137.6 ± 64.3</b><br><b>t(30) = 4.59, p &lt; .001</b>  | <b>1323.1 ± 81.0</b><br><b>t(30) = 4.18, p &lt; .001</b>  |
| <i>KCNQ2</i> WT + p.Thr287Ile (1ug:1 ug)                                  | 10 | 548.3 ± 62.37<br>t(30) = 1.18, p = .248                | 696.0±76.3<br>t(30) = 1.78, p = .086                    | <b>837.5±88.0</b><br><b>t(30) = 2.72, p = .011</b>      | <b>1007.6 ± 95.3</b><br><b>t(30) = 3.25, p = .003</b>    | <b>1164.3 ± 112.8</b><br><b>t(30) = 3.75, p &lt; .001</b> | <b>1323.5 ± 99.9</b><br><b>t(30) = 4.23, p &lt; .001</b>  |
| <i>KCNQ2</i> WT + p.Pro285Thr (1ug:1 ug)                                  | 10 | 540.9 ± 76.04<br>t(18) = 1.33, p = 0.194               | 687.2±90.3<br>t(18) = 1.93, p = 0.063                   | 858.8±102.6<br><b>t(18) = 2.15, p = 0.040</b>           | 1030.2 ± 122.6<br><b>t(18) = 2.54, p = 0.016</b>         | 1206.8 ± 152.5<br><b>t(18) = 2.54, p = 0.016</b>          | <b>1385.4 ± 163.6</b><br><b>t(30) = 2.63, p = 0.013</b>   |
| <i>KCNQ2</i> WT + <i>KCNQ3</i> WT (1ug:1 ug) §                            | 10 | 934.6 ± 151.96                                         | 1218.5±184.3                                            | 1530.9±236.7                                            | 1843.1 ± 290.9                                           | 2168.3 ± 330.6                                            | 2474.3 ± 395.3                                            |
| <i>KCNQ2</i> WT + p.Gly281Glu + <i>KCNQ3</i> WT<br>(0.5 ug: 0.5 ug: 1 ug) | 8  | <b>673.4 ± 87.4</b><br><b>t(18) = 4.31, p = 0.001</b>  | <b>914.1±120.9</b><br><b>t(18) = 4.02, p = 0.001</b>    | <b>1179.1±129.6</b><br><b>t(18) = 3.76, p = 0.002</b>   | <b>1481.4±116.6</b><br><b>t(18) = 3.30, p = 0.005</b>    | <b>1824.5 ± 117.5</b><br><b>t(18) = 2.79, p = 0.013</b>   | <b>2120.0 ± 65.9</b><br><b>t(18) = 2.49, p = 0.024</b>    |
| <i>KCNQ2</i> WT + p.Thr287Ile + <i>KCNQ3</i> WT                           | 10 | 818.1 ± 185.8                                          | <b>1012.8±211.6</b>                                     | <b>1244.7±265.0</b>                                     | <b>1435.4±218.4</b>                                      | <b>1667.1 ± 225.3</b>                                     | <b>1865.0 ± 155.9</b>                                     |

|                                                 |    |                                |                                       |                                       |                                       |                                       |                                         |
|-------------------------------------------------|----|--------------------------------|---------------------------------------|---------------------------------------|---------------------------------------|---------------------------------------|-----------------------------------------|
| (0.5 ug: 0.5 ug: 1 ug)                          |    | t(18) = 1.50, <i>p</i> = 0.150 | <b>t(18) = 2.38, <i>p</i> = 0.029</b> | <b>t(18) = 2.63, <i>p</i> = 0.017</b> | <b>t(18) = 3.43, <i>p</i> = 0.003</b> | <b>t(18) = 3.86, <i>p</i> = 0.001</b> | <b>t(18) = 4.24, <i>P</i> &lt; .001</b> |
| <i>KCNQ2</i> WT + p.Pro285Thr + <i>KCNQ3</i> WT | 10 | 820.9 ± 133.1                  | 1065.8 ± 144.9                        | <b>1321.1 ± 165.1</b>                 | <b>1570.0 ± 190.6</b>                 | <b>1803.6 ± 223.6</b>                 | <b>2038.8 ± 251.4</b>                   |
| (0.5 ug: 0.5 ug: 1 ug)                          |    | t(18) = 1.78, <i>p</i> = 0.092 | t(18) = 2.06, <i>p</i> = 0.054        | <b>t(18) = 2.30, <i>p</i> = 0.034</b> | <b>t(18) = 2.48, <i>p</i> = 0.023</b> | <b>t(18) = 2.89, <i>p</i> = 0.010</b> | <b>t(18) = 2.94, <i>p</i> = 0.009</b>   |

Bold fonts indicate *p* < 0.05.

WT, wild type; SD, standard deviation. The data were then fit to a Boltzmann distribution of the following form:  $G/G_{max} = 1/(1 + \exp[(V - V_{1/2})/dx])$ .

# The currents in the homomeric transfected variants and heteromeric transfected *KCNQ2* WT + variants were compared with the currents in *KCNQ2* WT respectively.

\$ The currents in the heteromeric *KCNQ2* WT + *KCNQ3* WT + variants were compared with the currents in *KCNQ2* WT + *KCNQ3* WT respectively.
