# Supplementary material for: KCNQ2 Selectivity Filter Mutations Cause Kv7.2 M-Current Dysfunction and Configuration Changes Manifesting as Epileptic Encephalopathies and Autistic Spectrum Disorders
Source: MDPI journal article supplement (doi:10.3390/cells11050894), 2022-03-05

**Supplemental Figure S1.** The total filters for the KCNQ2 protein expression on cell membranes are demonstrated and in the Figure 2D.

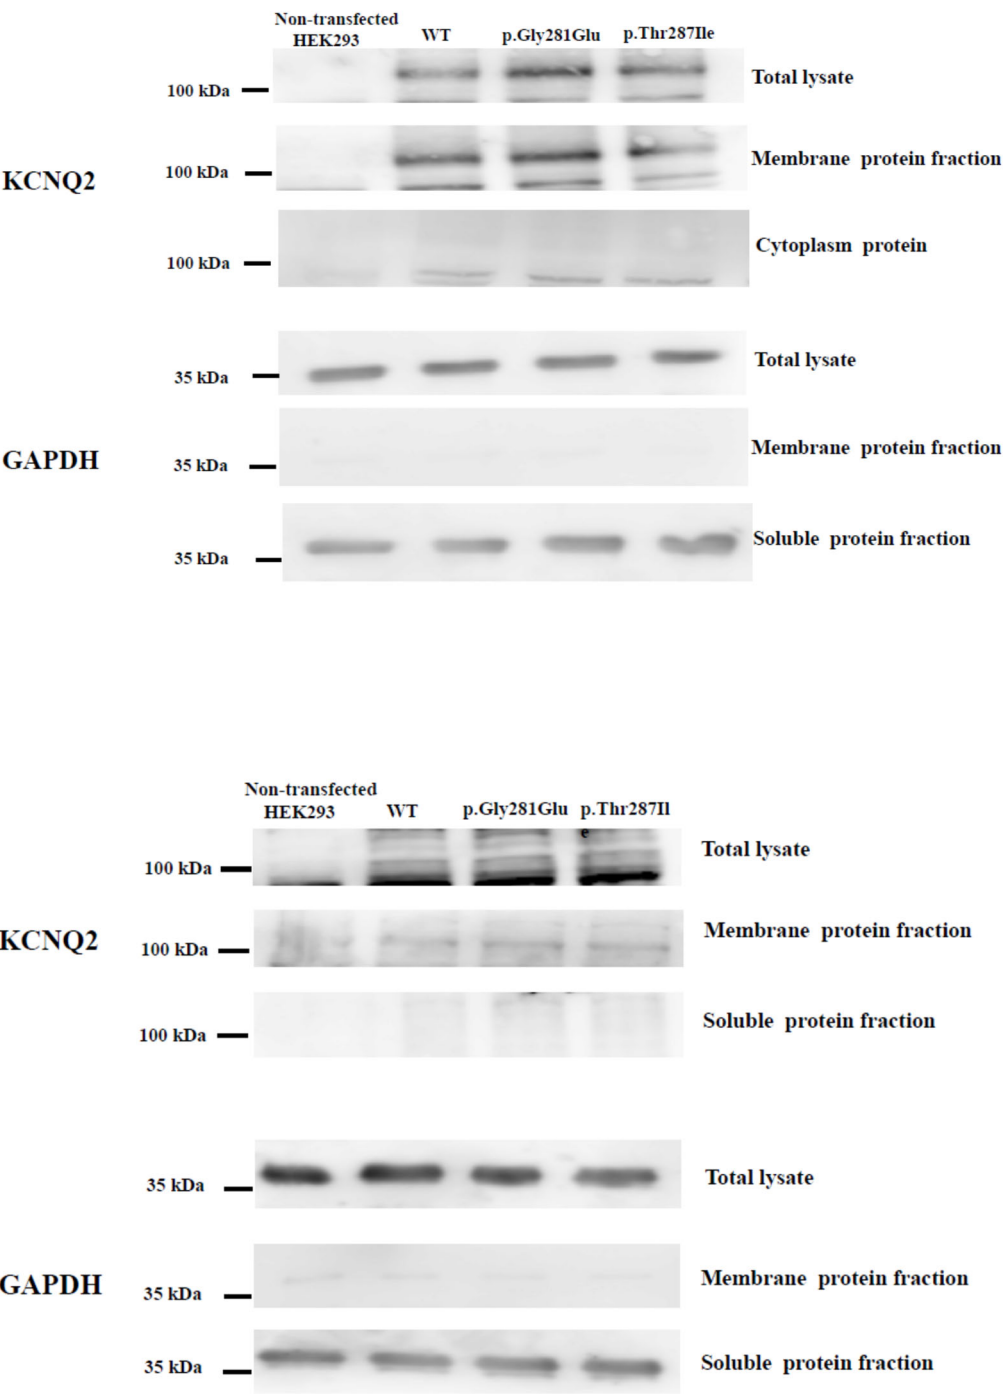

Supplement: s1 [file s1]
